# Supplementary material for: Application of Machine Learning (ML) and Artificial Intelligence (AI)-Based Tools for Modelling and Enhancing Sustainable Optimization of the Classical/Photo-Fenton Processes for the Landfill Leachate Treatment
Source: MDPI journal article supplement (doi:10.3390/su141811261), 2022-09-08
Supplement: s1 [file s1]

## Supplementary data

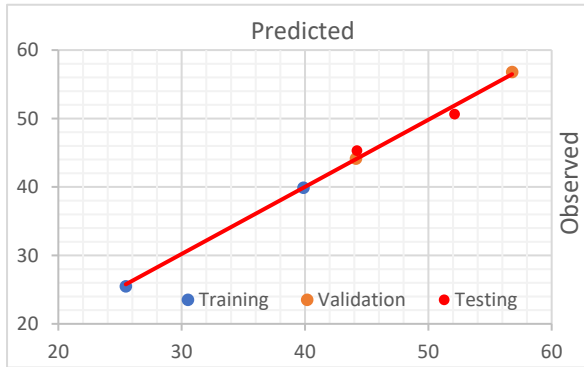

(a) Experiment 1

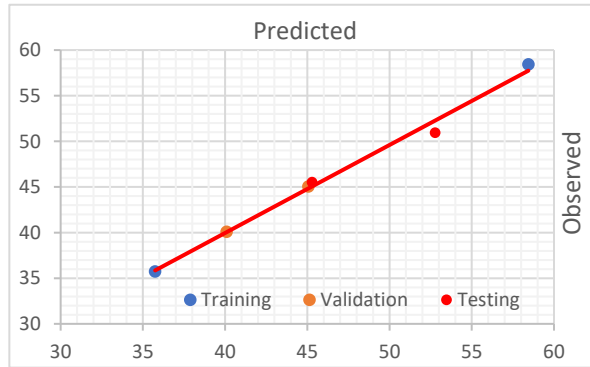

(b) Experiment 2

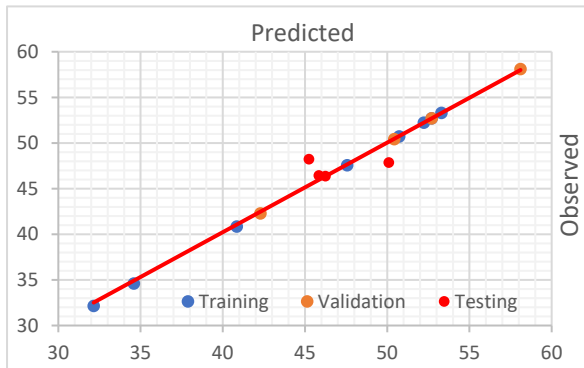

(c) Experiment 3

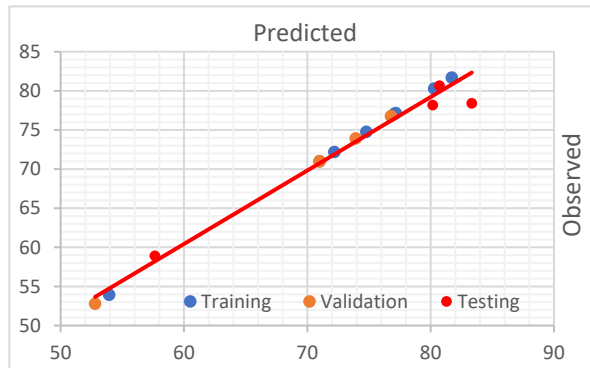

(d) Experiment 4

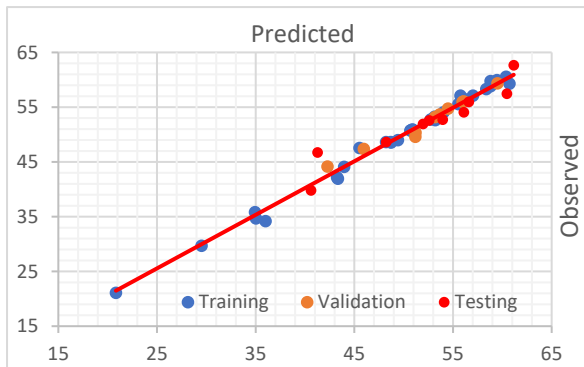

(e) Experiment 5

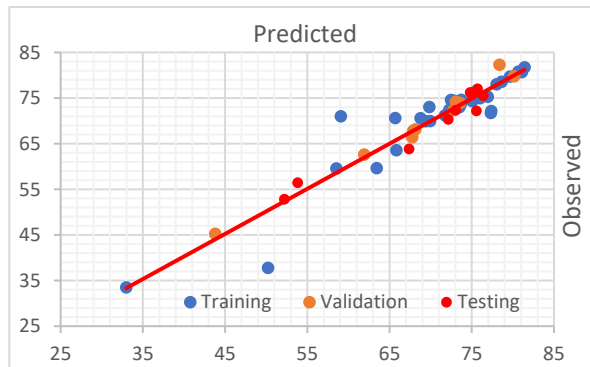

(f) Experiment 6

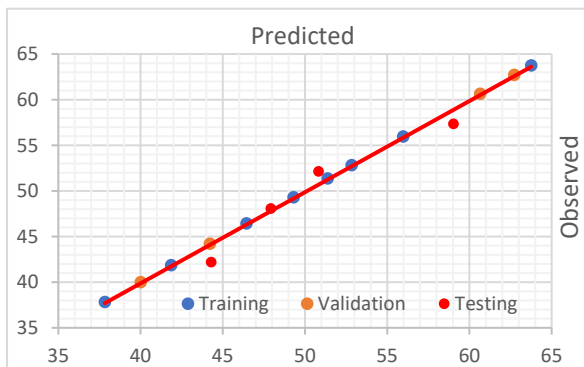

(g) Experiment 7

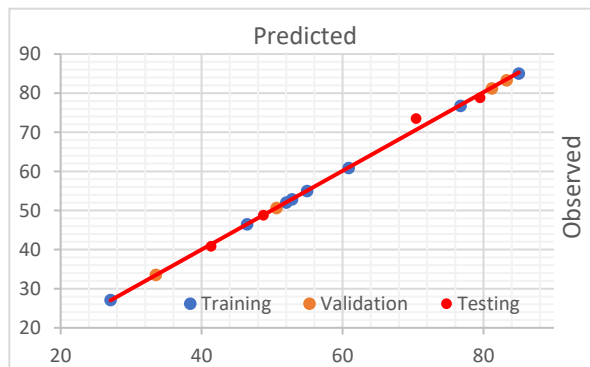

(h) Experiment 8

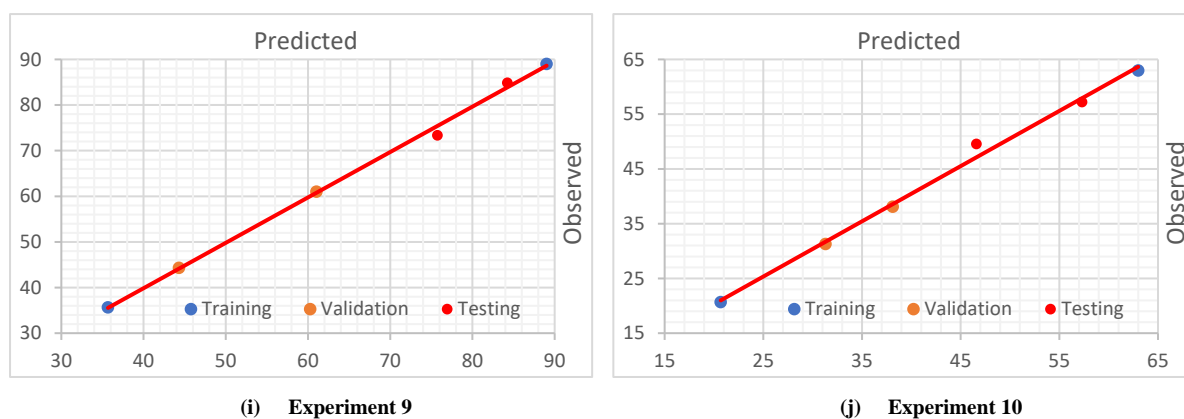

**Figure S1.** The scatter plots of the observed and the predicted parameters for the RBFN

**Table S1.** The modelling results in terms of RMSE.

| Exp.<br>No | Data  | RSM    |      | SVR    |      |              |      | FFNN     |      |          |      | RBFN     |      |          |      |
|------------|-------|--------|------|--------|------|--------------|------|----------|------|----------|------|----------|------|----------|------|
|            |       |        |      | Linear |      | Radial Basis |      | Gaussian |      | Linear   |      | Sigmoid  |      | RBFN     |      |
|            |       | MAPE   | Rank | MAPE   | Rank | MAPE         | Rank | MAPE     | Rank | MAPE     | Rank | MAPE     | Rank | MAPE     | Rank |
| 1          | Train | ----   | ---- | 0.5266 | 6    | 0.4381       | 4    | 0.4837   | 5    | 0.0002   | 2    | 0.0023   | 3    | 1.78E-12 | 1    |
|            | Val   | ---    | ---  | 0.0346 | 4    | 0.0368       | 5    | 0.0808   | 6    | 7.01E-08 | 3    | 1.33E-06 | 2    | 1.54E-12 | 1    |
|            | Test  | ----   | ---- | 0.0722 | 5    | 0.0947       | 6    | 0.0216   | 1    | 0.0481   | 3    | 0.0587   | 4    | 0.0268   | 2    |
|            | ALL   | 0.1296 | 4    | 0.2111 | 7    | 0.1899       | 5    | 0.1954   | 6    | 0.0161   | 2    | 0.0203   | 3    | 0.0089   | 1    |
| 2          | Train | ----   | ---- | 0.1787 | 4    | 0.2098       | 5    | 0.2120   | 6    | 5.40E-07 | 2    | 0.0014   | 3    | 2.92E-14 | 1    |
|            | Val   | ---    | ---  | 0.0638 | 4    | 0.0935       | 6    | 0.0913   | 5    | 6.12E-07 | 2    | 3.20E-05 | 3    | 4.60E-14 | 1    |
|            | Test  | ----   | ---- | 0.1587 | 6    | 0.0954       | 3    | 0.0954   | 3    | 0.0472   | 2    | 0.1045   | 5    | 0.0206   | 1    |
|            | ALL   | 0.0899 | 4    | 0.1337 | 7    | 0.1329       | 5    | 0.1329   | 5    | 0.0157   | 2    | 0.0353   | 3    | 0.0069   | 1    |
| 3          | Train | ----   | ---- | 0.1182 | 6    | 0.1041       | 5    | 0.0989   | 4    | 0.0068   | 3    | 0.0014   | 2    | 5.25E-13 | 1    |
|            | Val   | ---    | ---  | 0.0301 | 6    | 0.0233       | 5    | 0.0200   | 4    | 4.15E-05 | 2    | 0.0001   | 3    | 4.82E-13 | 1    |
|            | Test  | ----   | ---- | 0.0570 | 4    | 0.0594       | 5    | 0.0751   | 6    | 0.0441   | 2    | 0.0498   | 3    | 0.0312   | 1    |
|            | ALL   | 0.0437 | 4    | 0.0809 | 7    | 0.0727       | 5    | 0.0732   | 6    | 0.0145   | 3    | 0.0132   | 2    | 0.0078   | 1    |
| 4          | Train | ----   | ---- | 0.1161 | 5    | 0.0988       | 4    | 0.1509   | 6    | 2.45E-05 | 2    | 0.0002   | 3    | 7.32E-09 | 1    |
|            | Val   | ---    | ---  | 0.1021 | 5    | 0.1144       | 6    | 0.0247   | 4    | 1.40E-05 | 2    | 0.0001   | 3    | 1.09E-08 | 1    |
|            | Test  | ----   | ---- | 0.0791 | 6    | 0.0761       | 5    | 0.0563   | 2    | 0.0583   | 4    | 0.0344   | 1    | 0.0582   | 3    |
|            | ALL   | 0.0763 | 4    | 0.1033 | 7    | 0.0970       | 6    | 0.0957   | 5    | 0.0146   | 2    | 0.0087   | 1    | 0.0146   | 2    |
| 5          | Train | ----   | ---- | 0.1327 | 6    | 0.1134       | 4    | 0.1299   | 5    | 0.0330   | 2    | 0.0182   | 1    | 0.0347   | 3    |
|            | Val   | ---    | ---  | 0.0447 | 5    | 0.0598       | 6    | 0.0361   | 4    | 0.0149   | 3    | 0.0109   | 1    | 0.0144   | 2    |
|            | Test  | ----   | ---- | 0.0740 | 6    | 0.0709       | 5    | 0.0540   | 4    | 0.0413   | 3    | 0.0372   | 2    | 0.0257   | 1    |
|            | ALL   | 0.1158 | 7    | 0.1040 | 6    | 0.0946       | 4    | 0.0966   | 5    | 0.0311   | 3    | 0.0205   | 1    | 0.0289   | 2    |
| 6          | Train | ---    | ---  | 0.1780 | 6    | 0.1573       | 5    | 0.1538   | 4    | 0.0185   | 2    | 0.0269   | 3    | 0.0105   | 1    |
|            | Val   | ---    | ---  | 0.0434 | 4    | 0.0866       | 6    | 0.0780   | 5    | 0.0139   | 2    | 0.0176   | 3    | 0.0129   | 1    |
|            | Test  | ----   | ---- | 0.0933 | 5    | 0.0839       | 4    | 0.0963   | 6    | 0.0339   | 2    | 0.0376   | 3    | 0.0295   | 1    |
|            | ALL   | 0.0837 | 4    | 0.1350 | 7    | 0.1291       | 6    | 0.1277   | 5    | 0.0206   | 3    | 0.0272   | 3    | 0.0147   | 1    |
| 7          | Train | ----   | ---- | 0.0863 | 6    | 0.0579       | 4    | 0.0608   | 5    | 0.0003   | 2    | 0.0009   | 3    | 3.46E-11 | 1    |
|            | Val   | ---    | ---  | 0.0154 | 4    | 0.0213       | 6    | 0.0193   | 5    | 0.0003   | 3    | 0.0002   | 2    | 3.43E-11 | 1    |
|            | Test  | ----   | ---- | 0.0293 | 4    | 0.0590       | 6    | 0.0510   | 5    | 0.0188   | 2    | 0.0146   | 1    | 0.0268   | 3    |
|            | ALL   | 0.0321 | 4    | 0.0543 | 7    | 0.0490       | 6    | 0.0480   | 5    | 0.0049   | 2    | 0.0042   | 1    | 0.0067   | 3    |
| 8          | Train | ----   | ---- | 0.1275 | 6    | 0.1088       | 5    | 0.0911   | 4    | 0.0004   | 2    | 0.0022   | 3    | 1.51E-11 | 1    |
|            | Val   | ---    | ---  | 0.0315 | 4    | 0.0534       | 5    | 0.0682   | 6    | 0.0004   | 2    | 0.0010   | 3    | 2.04E-11 | 1    |
|            | Test  | ----   | ---- | 0.0833 | 6    | 0.0699       | 5    | 0.0698   | 4    | 0.0090   | 1    | 0.0170   | 3    | 0.0157   | 2    |
|            | ALL   | 0.0380 | 4    | 0.0924 | 7    | 0.0852       | 6    | 0.0801   | 5    | 0.0025   | 1    | 0.0056   | 3    | 0.0039   | 2    |
|            | Train | ----   | ---- | 0.0739 | 6    | 0.0703       | 4    | 0.0703   | 4    | 3.77E-05 | 2    | 0.0021   | 3    | 9.96E-17 | 1    |

|              |       |        |      |        |   |        |   |        |   |          |   |        |   |          |   |
|--------------|-------|--------|------|--------|---|--------|---|--------|---|----------|---|--------|---|----------|---|
| 9            | Val   | ---    | ---  | 0.0419 | 4 | 0.0588 | 5 | 0.0588 | 5 | 1.19E-05 | 2 | 0.0002 | 3 | 2.19E-16 | 1 |
|              | Test  | ----   | ---- | 0.0979 | 6 | 0.0198 | 3 | 0.0198 | 3 | 0.0207   | 5 | 0.0179 | 1 | 0.0196   | 2 |
|              | ALL   | 0.0440 | 4    | 0.0712 | 7 | 0.0496 | 5 | 0.0496 | 5 | 0.0069   | 3 | 0.0067 | 2 | 0.0065   | 1 |
| 10           | Train | ----   | ---- | 0.0731 | 4 | 0.1066 | 5 | 0.1066 | 5 | 2.93E-05 | 2 | 0.0038 | 3 | 1.55E-13 | 1 |
|              | Val   | ---    | ---  | 0.0668 | 6 | 0.0455 | 4 | 0.0455 | 4 | 1.42E-06 | 2 | 0.0001 | 3 | 2.92E-14 | 1 |
|              | Test  | ----   | ---- | 0.0757 | 6 | 0.0272 | 2 | 0.0272 | 2 | 0.0253   | 1 | 0.0340 | 4 | 0.0305   | 5 |
|              | ALL   | 0.0279 | 4    | 0.0719 | 7 | 0.0598 | 5 | 0.0598 | 5 | 0.0084   | 1 | 0.0126 | 3 | 0.0102   | 2 |
| Average Rank | Train | ---    |      | 5.50   |   | 4.50   |   | 4.80   |   | 2.10     |   | 2.70   |   | 1.20     |   |
|              | Val   | ---    |      | 4.60   |   | 5.40   |   | 4.80   |   | 2.30     |   | 2.60   |   | 1.10     |   |
|              | Test  | ---    |      | 5.40   |   | 4.40   |   | 3.60   |   | 2.50     |   | 2.70   |   | 2.10     |   |
|              | ALL   | 4.30   |      | 6.90   |   | 5.30   |   | 5.20   |   | 2.20     |   | 2.20   |   | 1.60     |   |

**Table S2.** The modelling results in terms of MAPE

| Exp.<br>No | Data  | RSM    |      | SVR     |      |              |      |          |      | FFNN     |      |         |      |          |      |
|------------|-------|--------|------|---------|------|--------------|------|----------|------|----------|------|---------|------|----------|------|
|            |       |        |      | Linear  |      | Radial Basis |      | Gaussian |      | Linear   |      | Sigmoid |      | RBFN     |      |
|            |       | MAPE   | Rank | MAPE    | Rank | MAPE         | Rank | MAPE     | Rank | MAPE     | Rank | MAPE    | Rank | MAPE     | Rank |
| 1          | Train | ----   | ---- | 17.3079 | 6    | 15.0981      | 4    | 16.9022  | 5    | 0.0073   | 2    | 0.0812  | 3    | 5.47E-11 | 1    |
|            | Val   | ---    | ---  | 1.4662  | 4    | 1.5408       | 5    | 5.0416   | 6    | 4.54E-06 | 2    | 0.0001  | 3    | 8.73E-11 | 1    |
|            | Test  | ----   | ---- | 4.0693  | 5    | 5.3844       | 6    | 1.2662   | 1    | 2.8366   | 3    | 2.9473  | 4    | 1.3040   | 2    |
|            | ALL   | 6.5863 | 4    | 10.3001 | 7    | 9.2973       | 5    | 10.2096  | 6    | 1.6377   | 2    | 1.7023  | 3    | 0.7528   | 1    |
| 2          | Train | ----   | ---- | 7.6197  | 4    | 9.8364       | 5    | 9.8364   | 5    | 3.57E-05 | 2    | 0.0605  | 3    | 1.29E-12 | 1    |
|            | Val   | ---    | ---  | 2.7192  | 4    | 6.2778       | 5    | 6.2778   | 5    | 3.69E-05 | 2    | 0.0017  | 3    | 1.96E-12 | 1    |
|            | Test  | ----   | ---- | 11.1658 | 6    | 4.2060       | 4    | 4.2060   | 4    | 2.1915   | 2    | 5.1856  | 3    | 1.3015   | 1    |
|            | ALL   | 5.2863 | 4    | 7.9609  | 7    | 7.1614       | 5    | 7.1614   | 5    | 1.2652   | 2    | 2.9941  | 3    | 0.7514   | 1    |
| 3          | Train | ----   | ---- | 5.9871  | 6    | 5.4010       | 5    | 5.2255   | 4    | 0.5484   | 3    | 0.0974  | 2    | 3.84E-11 | 1    |
|            | Val   | ---    | ---  | 2.4947  | 6    | 1.1884       | 5    | 1.0755   | 4    | 0.0020   | 2    | 0.0050  | 3    | 2.50E-11 | 1    |
|            | Test  | ----   | ---- | 3.1133  | 4    | 3.3511       | 5    | 4.5394   | 6    | 2.7828   | 2    | 3.1634  | 3    | 1.8951   | 1    |
|            | ALL   | 2.3672 | 4    | 4.6799  | 7    | 4.2126       | 5    | 4.3696   | 6    | 1.4444   | 2    | 1.5832  | 3    | 0.9475   | 1    |
| 4          | Train | ----   | ---- | 9.4600  | 4    | 9.7949       | 5    | 11.9474  | 6    | 0.0020   | 2    | 0.0176  | 3    | 7.58E-07 | 1    |
|            | Val   | ---    | ---  | 7.4531  | 5    | 9.6380       | 6    | 2.2101   | 4    | 0.0013   | 2    | 0.0098  | 3    | 8.48E-07 | 1    |
|            | Test  | ----   | ---- | 6.6401  | 5    | 6.7684       | 6    | 4.8412   | 2    | 5.0740   | 3    | 3.2223  | 1    | 5.6709   | 4    |
|            | ALL   | 6.2961 | 4    | 8.3460  | 5    | 9.0910       | 7    | 8.8573   | 6    | 2.5370   | 2    | 1.6112  | 1    | 2.8355   | 3    |
|            | Train | ----   | ---- | 11.2622 | 6    | 10.5508      | 4    | 11.2499  | 5    | 3.5637   | 2    | 1.9826  | 1    | 3.7171   | 3    |
|            | Val   | ---    | ---  | 4.3003  | 5    | 5.5169       | 6    | 4.1114   | 4    | 1.1814   | 2    | 0.9937  | 1    | 1.4611   | 3    |

|    |       |        |      |        |   |        |   |        |   |        |   |        |   |          |   |
|----|-------|--------|------|--------|---|--------|---|--------|---|--------|---|--------|---|----------|---|
| 5  | Test  | ----   | ---- | 7.4786 | 6 | 6.5700 | 5 | 4.2610 | 4 | 3.7504 | 3 | 3.3765 | 2 | 2.0045   | 1 |
|    | ALL   | 6.4586 | 4    | 9.5754 | 7 | 9.0607 | 5 | 9.1544 | 6 | 3.2789 | 3 | 2.1951 | 1 | 3.0992   | 2 |
| 6  | Train | ---    | ---  | 8.9985 | 6 | 8.5269 | 5 | 8.3141 | 4 | 1.1485 | 2 | 1.5926 | 3 | 0.7468   | 1 |
|    | Val   | ---    | ---  | 3.4208 | 4 | 5.0291 | 6 | 4.7308 | 5 | 0.9647 | 2 | 1.5567 | 3 | 0.9388   | 1 |
|    | Test  | ----   | ---- | 5.5577 | 5 | 5.1181 | 4 | 6.1739 | 6 | 2.3767 | 2 | 2.4189 | 3 | 2.1896   | 1 |
|    | ALL   | 7.0605 | 4    | 7.5875 | 7 | 7.3682 | 6 | 7.3403 | 5 | 1.4463 | 2 | 1.7788 | 3 | 1.2050   | 1 |
|    | Train | ----   | ---- | 5.4079 | 6 | 4.4035 | 5 | 4.3852 | 4 | 0.0181 | 2 | 0.0791 | 3 | 2.84E-09 | 1 |
|    | Val   | ---    | ---  | 1.0316 | 4 | 1.0566 | 5 | 1.1196 | 6 | 0.0211 | 3 | 0.0142 | 2 | 2.24E-09 | 1 |
| 7  | Test  | ----   | ---- | 1.6600 | 4 | 3.7897 | 6 | 3.6444 | 5 | 1.0909 | 3 | 0.9156 | 2 | 1.4914   | 3 |
|    | ALL   | 1.8223 | 4    | 3.9469 | 7 | 3.6831 | 6 | 3.6399 | 5 | 0.5457 | 2 | 0.4613 | 1 | 0.7457   | 3 |
| 8  | Train | ----   | ---- | 7.6391 | 6 | 6.2738 | 5 | 4.9459 | 4 | 0.0362 | 2 | 0.2083 | 3 | 1.22E-09 | 1 |
|    | Val   | ---    | ---  | 2.2318 | 4 | 2.6560 | 5 | 4.1138 | 6 | 0.0444 | 2 | 0.0809 | 3 | 1.21E-09 | 1 |
|    | Test  | ----   | ---- | 4.2301 | 4 | 4.8232 | 6 | 4.7006 | 5 | 0.4920 | 1 | 0.8088 | 2 | 1.6141   | 3 |
|    | ALL   | 2.4963 | 4    | 5.9073 | 7 | 5.2211 | 6 | 4.6889 | 5 | 0.2483 | 1 | 0.4323 | 2 | 0.8071   | 3 |
| 9  | Train | ----   | ---- | 3.1969 | 4 | 3.5171 | 6 | 3.5171 | 6 | 0.0035 | 2 | 0.0849 | 3 | 5.02E-15 | 1 |
|    | Val   |        |      | 2.9945 | 4 | 3.4806 | 6 | 3.4806 | 6 | 0.0009 | 2 | 0.0179 | 3 | 1.12E-14 | 1 |
|    | Test  | ----   | ---- | 9.5050 | 6 | 1.3256 | 3 | 1.3256 | 3 | 2.3695 | 5 | 1.4321 | 1 | 1.7143   | 2 |
|    | ALL   | 2.7026 | 4    | 6.0424 | 7 | 2.9576 | 5 | 2.9576 | 5 | 1.3680 | 3 | 0.8284 | 1 | 0.9897   | 2 |
| 10 | Train | ----   | ---- | 2.2767 | 4 | 3.0513 | 5 | 3.0513 | 5 | 0.0008 | 2 | 0.1052 | 3 | 4.33E-12 | 1 |
|    | Val   | ---    | ---  | 4.3536 | 6 | 2.1137 | 4 | 2.1137 | 4 | 0.0001 | 2 | 0.0064 | 3 | 1.00E-12 | 1 |
|    | Test  | ----   | ---- | 3.9664 | 6 | 1.7879 | 3 | 1.7879 | 3 | 1.3164 | 1 | 1.9197 | 2 | 2.1088   | 5 |
|    | ALL   | 1.4247 | 4    | 3.6455 | 7 | 2.3787 | 5 | 2.3787 | 5 | 0.7600 | 1 | 1.1100 | 2 | 1.2175   | 3 |
|    | Train | ---    |      | 5.20   |   | 4.90   |   | 4.80   |   | 2.10   |   | 2.70   |   | 1.20     |   |
|    | Val   | ---    |      | 4.60   |   | 5.30   |   | 5.00   |   | 2.10   |   | 2.70   |   | 1.20     |   |
|    | Test  | ---    |      | 5.10   |   | 4.80   |   | 3.90   |   | 2.50   |   | 2.30   |   | 2.30     |   |
|    | ALL   | 4.00   |      | 6.80   |   | 5.50   |   | 5.40   |   | 2.00   |   | 2.00   |   | 2.00     |   |
